# Supplementary material for: Tandem duplications lead to novel expression patterns through exon shuffling in Drosophila yakuba
Source: PubMed Central journal article supplement (PMC5460883; doi:10.1371/journal.pgen.1006795), 2017-05-22
Supplement: pgen.1006795.s002.pdf [file pgen.1006795.s002.pdf]

S1 Table: Genes upregulated using cuffdiff by tissue

| Tissue         | Duplicates Upregulated | Assayed | Background Upregulated | Assayed | $\chi^2$ | <i>P</i> -value |
|----------------|------------------------|---------|------------------------|---------|----------|-----------------|
| Male Carcass   | 4                      | 52      | 1861                   | 13174   | 0.9697   | 0.3268          |
| Male Testes    | 3                      | 52      | 1375                   | 13174   | 0.6097   | 0.4349          |
| Female Carcass | 4                      | 52      | 1733                   | 13174   | 0.6993   | 0.4030          |
| Female Ovary   | 4                      | 52      | 1343                   | 13174   | 0.0977   | 0.7546          |
