# Supplementary material for: Tandem duplications lead to novel expression patterns through exon shuffling in Drosophila yakuba
Source: PubMed Central journal article supplement (PMC5460883; doi:10.1371/journal.pgen.1006795), 2017-05-22
Supplement: pgen.1006795.s003.pdf [file pgen.1006795.s003.pdf]

S2 Table: Whole gene duplications with upregulated expression using Cuffdiff

| tissue         | gene    | strain | Ref FPKM | Sample FPKM | corrected <i>P</i> -value |
|----------------|---------|--------|----------|-------------|---------------------------|
| Male Carcass   | 2.g417  | line9  | 74.8960  | 275.4010    | 0.00102288                |
|                | GE11098 | line9  | 36.3276  | 200.8140    | $4.0626 \times 10^{-6}$   |
|                | GE11098 | line10 | 36.3276  | 132.5500    | 0.00133                   |
|                | GE24648 | line1  | 2.7300   | 9.2186      | 0.0260                    |
| Male Testes    | GE26061 | line9  | 10.9718  | 28.8023     | 0.0371                    |
|                | 2.g556  | line5  | 0.3080   | 2.27934     | 0.0122                    |
|                | 2.g556  | line15 | 0.3080   | 2.0057      | 0.0230                    |
|                | GE11098 | line10 | 620.5090 | 4025.7000   | $9.7604 \times 10^{-4}$   |
| Female Carcass | GE14157 | line13 | 1.1743   | 8.2437      | 0.0030                    |
|                | GE13159 | line19 | 2.0217   | 7.96624     | 0.0031                    |
|                | GE14157 | line2  | 0.6146   | 2.8779      | 0.0046                    |
|                | GE20775 | line8  | 1.6645   | 18.4707     | $2.20709 \times 10^{-5}$  |
| Female Ovary   | GE26133 | line14 | 22.0725  | 58.6217     | 0.0421                    |
|                | 2.g556  | line2  | 0.0686   | 0.7511      | 0.0019                    |
|                | 2.g556  | line5  | 0.0686   | 2.6958      | $1.13228 \times 10^{-8}$  |
|                | 2.g556  | line6  | 0.0686   | 1.1139      | $9.73427 \times 10^{-5}$  |
|                | 2.g556  | line9  | 0.0686   | 2.0189      | $3.16552 \times 10^{-7}$  |
|                | 2.g556  | line13 | 0.0686   | 8.0706      | 0                         |
|                | 2.g556  | line15 | 0.0686   | 4.6893      | $6.89843 \times 10^{-12}$ |
|                | 2.g556  | line19 | 0.0686   | 1.8320      | $8.96617 \times 10^{-7}$  |
|                | GE24648 | line1  | 5.2891   | 28.7428     | $1.96519 \times 10^{-7}$  |
|                | GE26061 | line9  | 8.1007   | 24.2368     | 0.0040                    |
|                | GE24030 | line6  | 2.0279   | 10.5760     | $1.17696 \times 10^{-5}$  |
