# Supplementary material for: Tandem duplications lead to novel expression patterns through exon shuffling in Drosophila yakuba
Source: PubMed Central journal article supplement (PMC5460883; doi:10.1371/journal.pgen.1006795), 2017-05-22
Supplement: pgen.1006795.s004.pdf [file pgen.1006795.s004.pdf]

S3 Table: Functions of whole gene duplications with upregulated expression

| Gene     | <i>D. melanogaster</i> ortholog | function                                                       |
|----------|---------------------------------|----------------------------------------------------------------|
| Cuffdiff | <i>2.g417</i>                   | <i>CG42808</i> no function                                     |
|          | <i>GE11098</i>                  | <i>Spn38F</i> endopeptidase. Reproduction. Seminal fluid gene. |
|          | <i>GE24648</i>                  | <i>UGt86Di</i> glucuronosyltransferase activity, metabolism    |
|          | <i>GE26061</i>                  | <i>Sodh-2</i> Sorbitol dehydrogenase                           |
|          | <i>2.g556</i>                   | <i>CG8894</i> coumarate ligase, metabolic process              |
|          | <i>GE14157</i>                  | <i>Pms2</i> mismatch repair, recombination, MutL alpha complex |
|          | <i>GE13159</i>                  | <i>CG13283</i> metalloendopeptidase                            |
|          | <i>GE20775</i>                  | <i>Cp16</i> chorion protein                                    |
|          | <i>GE26133</i>                  | <i>CG14907</i> unknown                                         |
|          | <i>GE24030</i>                  | <i>CG33099</i> gibberellin 20-oxidase activity                 |
| HMM      | <i>GE19533</i>                  | $\gamma$ -trypsin endopeptidase                                |
|          | <i>GE26134</i>                  | <i>CG14906</i> methyltransferase                               |
|          | <i>GE13159</i>                  | <i>CG13283</i> metallo endopeptidase                           |
|          | <i>2.g417</i>                   | <i>CG42808</i> unknown                                         |
|          | <i>GE26133</i>                  | <i>CG14907</i> unknown                                         |
