# Supplementary material for: Tandem duplications lead to novel expression patterns through exon shuffling in Drosophila yakuba
Source: PubMed Central journal article supplement (PMC5460883; doi:10.1371/journal.pgen.1006795), 2017-05-22
Supplement: pgen.1006795.s005.pdf [file pgen.1006795.s005.pdf]

S4 Table: Genes upregulated using cuffdiff tissue, singleton variants only

| Tissue         | Duplicates Upregulated | Assayed | Background Upregulated | Assayed | $\chi^2$ (2 <i>df</i> ) | <i>P</i> -value |
|----------------|------------------------|---------|------------------------|---------|-------------------------|-----------------|
| Male Carcass   | 2                      | 33      | 1861                   | 13174   | 0.8821                  | 0.3476          |
| Male Testes    | 0                      | 33      | 1375                   | 13174   | 2.4248                  | 0.1194          |
| Female Carcass | 2                      | 33      | 1733                   | 13174   | 0.6826                  | 0.4087          |
| Female Ovary   | 2                      | 33      | 1343                   | 13174   | 0.1844                  | 0.6676          |
