# Supplementary material for: Tandem duplications lead to novel expression patterns through exon shuffling in Drosophila yakuba
Source: PubMed Central journal article supplement (PMC5460883; doi:10.1371/journal.pgen.1006795), 2017-05-22
Supplement: pgen.1006795.s006.pdf [file pgen.1006795.s006.pdf]

S5 Table: SNPs in whole gene duplications with significantly asymmetric expression in male tissues

| tissue       | gene       | strain | chrom    | position | Ref DNA | SNP DNA | Ref RNA | SNP RNA           | corrected <i>P</i> -value |
|--------------|------------|--------|----------|----------|---------|---------|---------|-------------------|---------------------------|
| Male Carcass | 0.g329.t1  | 8      | 3L       | 3183795  | 637     | 399     | 2063    | 2                 | 4.89393946382e-213        |
|              | 0.g329.t1  | 8      | 3L       | 3184332  | 651     | 576     | 779     | 2                 | 3.89050343567e-150        |
|              | 0.g859.t1  | 8      | 3L       | 11082675 | 165     | 75      | 1       | 12                | 1.49171249502e-05         |
|              | 0.g859.t1  | 8      | 3L       | 11082675 | 165     | 75      | 1       | 12                | 1.49171249502e-05         |
|              | 0.g859.t1  | 8      | 3L       | 11082683 | 171     | 74      | 1       | 13                | 3.69987951873e-06         |
|              | 0.g859.t1  | 8      | 3L       | 11082683 | 171     | 74      | 1       | 13                | 3.69987951873e-06         |
|              | 2.g556.t1  | 6      | 2R       | 8629312  | 58      | 15      | 1       | 10                | 1.0623042423e-05          |
|              | GE10463-PA | 13     | 3R       | 21435864 | 55      | 193     | 11      | 4                 | 7.09435847431e-05         |
|              | GE10463-PA | 13     | 3R       | 21435877 | 66      | 177     | 11      | 3                 | 0.000159872217862         |
|              | GE13533-PA | 10     | 2R       | 9720730  | 15      | 28      | 116     | 14                | 1.13741757158e-11         |
|              | GE13533-PA | 15     | 2R       | 9720271  | 14      | 22      | 107     | 0                 | 8.960918582e-17           |
|              | GE13533-PA | 15     | 2R       | 9720287  | 14      | 24      | 100     | 0                 | 2.20590551317e-17         |
|              | GE13533-PA | 15     | 2R       | 9720297  | 13      | 20      | 63      | 0                 | 2.65130711181e-12         |
|              | GE13533-PA | 15     | 2R       | 9720727  | 16      | 13      | 168     | 2245              | 1.63605650167e-11         |
|              | GE13533-PA | 19     | 2R       | 9720355  | 22      | 26      | 17      | 1                 | 0.000234896411228         |
|              | GE13533-PA | 19     | 2R       | 9720857  | 18      | 23      | 30      | 1                 | 8.68742192434e-07         |
|              | GE13533-PA | 6      | 2R       | 9720839  | 15      | 17      | 51      | 0                 | 2.77614176204e-09         |
|              | GE13533-PA | 8      | 2R       | 9720271  | 28      | 62      | 40      | 1                 | 5.85617255782e-14         |
|              | GE13533-PA | 8      | 2R       | 9720287  | 25      | 39      | 36      | 1                 | 7.34378080343e-10         |
|              | GE13533-PA | 8      | 2R       | 9720839  | 35      | 21      | 39      | 0                 | 2.38343784016e-06         |
|              | GE13533-PA | 9      | 2R       | 9720610  | 57      | 28      | 96      | 1162              | 8.92999655904e-38         |
|              | GE13533-PA | 9      | 2R       | 9720619  | 67      | 24      | 1168    | 9                 | 3.69329213005e-22         |
|              | GE13533-PA | 9      | 2R       | 9720832  | 62      | 40      | 236     | 10                | 7.61814926037e-16         |
|              | GE13533-PA | 9      | 2R       | 9720839  | 44      | 37      | 163     | 4                 | 3.80443675518e-17         |
|              | GE23591-PA | 11     | 3R       | 25375009 | 104     | 42      | 15      | 37                | 1.50368037049e-07         |
|              | GE23591-PA | 11     | 3R       | 25375009 | 104     | 42      | 15      | 37                | 1.50368037049e-07         |
|              | GE24661-PA | 16     | 3R       | 10718463 | 96      | 55      | 20      | 0                 | 0.000492528656681         |
|              | GE24661-PA | 16     | 3R       | 10718959 | 12      | 35      | 11      | 0                 | 5.93818095445e-06         |
|              | GE13533-PA | 15     | 2R       | 9720271  | 14      | 22      | 29      | 1                 | 3.59877183641e-07         |
|              | GE13533-PA | 15     | 2R       | 9720287  | 14      | 24      | 29      | 1                 | 1.30865588635e-07         |
|              | GE13533-PA | 15     | 2R       | 9720297  | 13      | 20      | 25      | 0                 | 4.50871233984e-07         |
|              | GE13533-PA | 15     | 2R       | 9720565  | 17      | 9       | 20      | 0                 | 0.00298852790899          |
|              | GE13533-PA | 15     | 2R       | 9720727  | 16      | 13      | 3       | 887               | 5.81798034916e-24         |
|              | GE13533-PA | 9      | 2R       | 9720610  | 57      | 28      | 8       | 93                | 5.47341750466e-18         |
|              | GE13533-PA | 9      | 2R       | 9720619  | 67      | 24      | 93      | 1                 | 1.09737678153e-07         |
|              | GE13533-PA | 9      | 2R       | 9720832  | 62      | 40      | 23      | 0                 | 9.23227815148e-05         |
|              | GE13533-PA | 9      | 2R       | 9720839  | 44      | 37      | 16      | 1                 | 0.00198444795458          |
|              | GE19240-PC | 2      | 2L       | 17480166 | 102     | 67      | 14      | 0                 | 0.00237723089624          |
|              | GE19240-PC | 2      | 2L       | 17480166 | 102     | 67      | 14      | 0                 | 0.00237723089624          |
|              | GE19240-PC | 2      | 2L       | 17480167 | 54      | 78      | 15      | 0                 | 4.7992479603e-06          |
|              | GE19240-PC | 2      | 2L       | 17480167 | 54      | 78      | 15      | 0                 | 4.7992479603e-06          |
|              | GE23591-PA | 11     | 3R       | 25374738 | 100     | 96      | 16      | 5                 | 0.0371312257219           |
|              | GE23591-PA | 11     | 3R       | 25374738 | 100     | 96      | 16      | 5                 | 0.0371312257219           |
|              | GE23591-PA | 11     | 3R       | 25375009 | 104     | 42      | 4       | 22                | 1.02571089037e-07         |
|              | GE23591-PA | 11     | 3R       | 25375009 | 104     | 42      | 4       | 22                | 1.02571089037e-07         |
| GE23591-PA   | 17         | 3R     | 25374052 | 121      | 62      | 3       | 12      | 0.000612351367959 |                           |
| GE23591-PA   | 17         | 3R     | 25374052 | 121      | 62      | 3       | 12      | 0.000612351367959 |                           |
| GE23591-PA   | 17         | 3R     | 25374849 | 94       | 48      | 10      | 19      | 0.00292326920619  |                           |
| GE23591-PA   | 17         | 3R     | 25374849 | 94       | 48      | 10      | 19      | 0.00292326920619  |                           |
| GE23591-PA   | 17         | 3R     | 25375009 | 39       | 26      | 6       | 15      | 0.0223502005748   |                           |
| GE23591-PA   | 17         | 3R     | 25375009 | 39       | 26      | 6       | 15      | 0.0223502005748   |                           |
| GE24516-PA   | 16         | 3R     | 12582212 | 76       | 36      | 58      | 0       | 4.50226144562e-08 |                           |
| GE24516-PA   | 16         | 3R     | 12583002 | 41       | 59      | 0       | 49      | 2.67572903526e-09 |                           |
| GE24516-PA   | 16         | 3R     | 12583021 | 44       | 33      | 36      | 0       | 2.51789090039e-07 |                           |
| GE24661-PA   | 16         | 3R     | 10718463 | 96       | 55      | 12      | 0       | 0.00880153601503  |                           |
| GE24661-PA   | 16         | 3R     | 10718791 | 29       | 68      | 0       | 18      | 0.0058982953165   |                           |
