# Supplementary material for: Tandem duplications lead to novel expression patterns through exon shuffling in Drosophila yakuba
Source: PubMed Central journal article supplement (PMC5460883; doi:10.1371/journal.pgen.1006795), 2017-05-22
Supplement: pgen.1006795.s007.pdf [file pgen.1006795.s007.pdf]

S6 Table: SNPs in whole gene duplications with significantly asymmetric expression in female tissues

| tissue         | gene         | strain     | chrom | position | Ref Genomic | SNP Genomic | Ref RNA-seq | SNP RNA-seq | corrected <i>P</i> -value |                   |
|----------------|--------------|------------|-------|----------|-------------|-------------|-------------|-------------|---------------------------|-------------------|
| Female Carcass | 2.g556.t1    | 9          | 2R    | 8628170  | 52          | 61          | 13          | 0           | 0.000134635282947         |                   |
|                | GE13533-PA   | 2          | 2R    | 9720296  | 7           | 21          | 249         | 2           | 1.37883018113e-23         |                   |
|                | GE13533-PA   | 2          | 2R    | 9720297  | 7           | 22          | 248         | 0           | 7.61164181427e-27         |                   |
|                | GE13533-PA   | 6          | 2R    | 9720271  | 21          | 11          | 38          | 0           | 5.9627472227e-05          |                   |
|                | GE13533-PA   | 6          | 2R    | 9720287  | 16          | 10          | 38          | 0           | 3.50671569654e-05         |                   |
|                | GE13533-PA   | 6          | 2R    | 9720839  | 15          | 17          | 39          | 0           | 5.46168656421e-08         |                   |
|                | GE13533-PA   | 8          | 2R    | 9720271  | 28          | 62          | 60          | 0           | 1.73436067901e-20         |                   |
|                | GE13533-PA   | 8          | 2R    | 9720287  | 25          | 39          | 58          | 0           | 4.23964503844e-15         |                   |
|                | GE13533-PA   | 8          | 2R    | 9720839  | 35          | 21          | 5647        | 6           | 2.64131038422e-39         |                   |
|                | GE13533-PA   | 9          | 2R    | 9720610  | 57          | 28          | 67          | 1214        | 1.36030183298e-44         |                   |
|                | GE13533-PA   | 9          | 2R    | 9720619  | 67          | 24          | 1177        | 2           | 4.3505030628e-27          |                   |
|                | GE13533-PA   | 9          | 2R    | 9720832  | 62          | 40          | 619         | 12          | 1.53640332343e-27         |                   |
|                | GE13533-PA   | 9          | 2R    | 9720839  | 44          | 37          | 335         | 1           | 4.32719602547e-29         |                   |
|                | GE13533-PA   | 10         | 2R    | 9720730  | 15          | 28          | 468         | 4           | 3.64633793886e-31         |                   |
|                | GE13533-PA   | 15         | 2R    | 9720271  | 14          | 22          | 445         | 0           | 6.83413786614e-29         |                   |
|                | GE13533-PA   | 15         | 2R    | 9720287  | 14          | 24          | 438         | 1           | 1.36160863106e-29         |                   |
|                | GE13533-PA   | 15         | 2R    | 9720297  | 13          | 20          | 294         | 0           | 1.29111129899e-23         |                   |
|                | GE13533-PA   | 15         | 2R    | 9720727  | 16          | 13          | 658         | 1           | 8.38049203847e-19         |                   |
|                | GE13533-PA   | 19         | 2R    | 9720355  | 22          | 26          | 48          | 1           | 1.91720088454e-09         |                   |
|                | GE13533-PA   | 19         | 2R    | 9720857  | 18          | 23          | 41          | 2           | 1.44452774476e-07         |                   |
|                | GE13533-PA   | 19         | 2R    | 9720875  | 20          | 38          | 0           | 32          | 4.15947174032e-05         |                   |
|                | GE20775-PA   | 8          | 3L    | 3185046  | 570         | 372         | 25          | 0           | 7.36488931564e-06         |                   |
|                | GE20775-PA   | 8          | 3L    | 3185052  | 536         | 357         | 25          | 0           | 7.26234794398e-06         |                   |
|                | GE20775-PA   | 8          | 3L    | 3185112  | 377         | 517         | 22          | 0           | 8.20383183941e-09         |                   |
|                | GE20775-PA   | 8          | 3L    | 3185229  | 178         | 162         | 18          | 0           | 2.27731906792e-05         |                   |
|                | Female Ovary | 0.g329.t1  | 8     | 3L       | 3183371     | 300         | 246         | 24          | 0                         | 1.43200054203e-06 |
|                |              | 0.g329.t1  | 8     | 3L       | 3183545     | 524         | 329         | 29          | 0                         | 1.44529786542e-06 |
|                |              | GE19240-PC | 2     | 2L       | 17480167    | 54          | 78          | 14          | 0                         | 1.0224484785e-05  |
|                |              | GE19240-PC | 2     | 2L       | 17480167    | 54          | 78          | 14          | 0                         | 1.0224484785e-05  |
|                |              | GE21202-PA | 9     | 3L       | 1897080     | 96          | 42          | 47          | 0                         | 1.04727614702e-06 |
|                |              | GE24516-PA | 16    | 3R       | 12582212    | 76          | 36          | 247         | 4                         | 1.43363038229e-16 |
|                |              | GE24516-PA | 16    | 3R       | 12583002    | 41          | 59          | 31          | 158                       | 7.49321729398e-06 |
| GE24516-PA     |              | 16         | 3R    | 12583021 | 44          | 33          | 155         | 24          | 9.30200258675e-07         |                   |
