# Supplementary material for: Tandem duplications lead to novel expression patterns through exon shuffling in Drosophila yakuba
Source: PubMed Central journal article supplement (PMC5460883; doi:10.1371/journal.pgen.1006795), 2017-05-22
Supplement: pgen.1006795.s008.pdf [file pgen.1006795.s008.pdf]

S7 Table: Upregulated sites genomewide

| Chromosome | Upregulated | All       | Proportion |
|------------|-------------|-----------|------------|
| 2L         | 17866800    | 22324452  | 0.0534     |
| 2R         | 19202652    | 21139217  | 0.0606     |
| 3L         | 18281473    | 24197627  | 0.0504     |
| 3R         | 22455173    | 28832112  | 0.0519     |
| X          | 15544647    | 21770863  | 0.0476     |
| All        | 93350745    | 118264271 | 0.0526     |
