# Supplementary material for: Tandem duplications lead to novel expression patterns through exon shuffling in Drosophila yakuba
Source: PubMed Central journal article supplement (PMC5460883; doi:10.1371/journal.pgen.1006795), 2017-05-22
Supplement: pgen.1006795.s009.pdf [file pgen.1006795.s009.pdf]

S8 Table: Upregulated genes

| Chimeras   | Tissue         | $\geq 50$ bp Upregulated | Total |
|------------|----------------|--------------------------|-------|
|            | Female Carcass | 39                       | 76    |
|            | Female Ovary   | 40                       | 76    |
|            | Male Carcass   | 41                       | 76    |
|            | Male Testes    | 44                       | 76    |
|            | All            | 55                       | 76    |
| Whole Gene | Tissue         | $\geq 50$ bp Upregulated | Total |
|            | Female Carcass | 17                       | 66    |
|            | Female Ovary   | 18                       | 66    |
|            | Male Carcass   | 20                       | 66    |
|            | Male Testes    | 18                       | 66    |
|            | All            | 36                       | 66    |
