# Supplementary material for: Tandem duplications lead to novel expression patterns through exon shuffling in Drosophila yakuba
Source: PubMed Central journal article supplement (PMC5460883; doi:10.1371/journal.pgen.1006795), 2017-05-22
Supplement: pgen.1006795.s010.pdf [file pgen.1006795.s010.pdf]

S9 Table: Length of 'de novo' gene segments

| tissue         | chromosome | start    | stop     | strain | size (bp) |
|----------------|------------|----------|----------|--------|-----------|
| Male Carcass   | 2L         | 4764717  | 4771771  | 1      | 201       |
|                | 2L         | 7100699  | 7103913  | 6      | 212       |
|                | 2L         | 7043543  | 7048586  | 5      | 217       |
|                | 2L         | 7043543  | 7048586  | 9      | 224       |
|                | 2L         | 22076307 | 22081156 | 13     | 237       |
|                | 2L         | 22076307 | 22081156 | 5      | 246       |
|                | 2L         | 22217615 | 22221738 | 17     | 248       |
|                | 2L         | 22076307 | 22081156 | 15     | 254       |
|                | 3L         | 7643207  | 7647178  | 6      | 256       |
|                | 2L         | 7043543  | 7048586  | 10     | 256       |
|                | 2R         | 1296122  | 1299376  | 19     | 380       |
|                | 2R         | 1298866  | 1302456  | 19     | 380       |
|                | 2L         | 22076307 | 22081156 | 14     | 384       |
|                | 3R         | 14703209 | 14705506 | 11     | 754       |
|                | 2R         | 550564   | 555698   | 13     | 1364      |
| Male Testes    | 2R         | 8628288  | 8637097  | 5      | 202       |
|                | 2L         | 14844348 | 14850368 | 2      | 205       |
|                | 2L         | 19481376 | 19484185 | 11     | 214       |
|                | 2L         | 21809552 | 21814176 | 5      | 227       |
|                | 3R         | 15663794 | 15666868 | 8      | 234       |
|                | 2L         | 21860804 | 21864242 | 19     | 245       |
|                | X          | 8626278  | 8645156  | 12     | 256       |
|                | 2R         | 1296122  | 1299376  | 13     | 278       |
|                | 2R         | 1298866  | 1302456  | 13     | 278       |
|                | 2L         | 22076307 | 22081156 | 5      | 292       |
|                | 2R         | 1296122  | 1299376  | 19     | 303       |
|                | 2R         | 1298866  | 1302456  | 9      | 304       |
|                | 3R         | 28773101 | 28773775 | 8      | 306       |
|                | 2L         | 7043543  | 7048586  | 9      | 326       |
|                | 2R         | 12531901 | 12536511 | 10     | 327       |
|                | 2L         | 1858014  | 1866626  | 19     | 353       |
|                | 2L         | 4764717  | 4771771  | 1      | 353       |
|                | 2R         | 1298866  | 1302456  | 19     | 355       |
|                | 2L         | 22229672 | 22240590 | 12     | 374       |
|                | 2L         | 22076307 | 22081156 | 13     | 380       |
|                | 2R         | 261487   | 266019   | 2      | 381       |
|                | 2R         | 13593056 | 13597666 | 11     | 387       |
|                | 3L         | 15707277 | 15731097 | 6      | 412       |
|                | 2L         | 5056039  | 5058911  | 5      | 428       |
|                | 2R         | 15243572 | 15249038 | 6      | 481       |
|                | 3R         | 7559447  | 7567609  | 6      | 569       |
|                | 3R         | 14703209 | 14705506 | 11     | 575       |
| 2L             | 22076307   | 22081156 | 14       | 594    |           |
| 2L             | 22229672   | 22240590 | 13       | 846    |           |
| Female Carcass | 3L         | 7643207  | 7647178  | 6      | 204       |
|                | 2L         | 22076307 | 22081156 | 15     | 227       |
|                | 2L         | 22076307 | 22081156 | 13     | 228       |
|                | 2R         | 1298866  | 1302456  | 13     | 231       |
|                | 2L         | 6538411  | 6540646  | 1      | 258       |
|                | 2R         | 1296122  | 1299376  | 13     | 353       |
|                | 3R         | 14703209 | 14705506 | 11     | 770       |
| Female Ovary   | 2R         | 550564   | 555698   | 13     | 1056      |
|                | X          | 21252863 | 21277771 | 14     | 343       |
|                | 2R         | 1340493  | 1343865  | 6      | 686       |
