# Supplementary material for: Tandem duplications lead to novel expression patterns through exon shuffling in Drosophila yakuba
Source: PubMed Central journal article supplement (PMC5460883; doi:10.1371/journal.pgen.1006795), 2017-05-22
Supplement: pgen.1006795.s011.pdf [file pgen.1006795.s011.pdf]

S10 Table: FPKM for recruited non-coding parental genes

| Gene    | Female Carcass | Female Ovary | Male Carcass | Male Testes |
|---------|----------------|--------------|--------------|-------------|
| GE19344 | 1.11753        | 4.32018      | 0.956197     | 1.4404      |
| GE20665 | 28.1935        | 19.4317      | 29.7131      | 17.7321     |
| 2.g418  | 8.6822         | 0.0          | 3.83027      | 3.80075     |
| GE14641 | 0.00866161     | 0.0          | 3.06248      | 51.3189     |
| GE14103 | 36.4129        | 135.039      | 28.3912      | 86.1859     |
| 3.g1278 | 9.08642        | 10.7779      | 10.0527      | 11.0089     |
| GE20792 | 10.8708        | 21.321       | 8.42913      | 5.57496     |
| GE17340 | 0.77299        | 20.1854      | 3.78907      | 79.9769     |
| GE22019 | 68.3313        | 9.05024      | 89.1704      | 43.2689     |
| 2.g418  | 8.6822         | 0.0          | 3.83027      | 3.80075     |
| GE26314 | 5.25971        | 12.9278      | 3.99471      | 8.6008      |
| 4.g321  | 0.935342       | 0.405618     | 0.908753     | 0.551468    |
| 1.g396  | 0.548732       | 0.0167492    | 1.65429      | 26.874      |
| GE22133 | 14.7227        | 83.3471      | 15.9165      | 23.4822     |
| GE18873 | 7.2591         | 55.5697      | 5.87663      | 23.0839     |
| GE18174 | 58.0966        | 34.1165      | 55.9907      | 31.9375     |
| GE19410 | 13.1419        | 47.2782      | 13.6642      | 88.2691     |
| GE22569 | 0.0237261      | 0.0          | 0.0238531    | 0.419282    |
| GE15832 | 0.0205719      | 0.150601     | 0.0233789    | 0.158375    |
| 2.g1622 | 0.484331       | 0.0          | 0.083226     | 0.213026    |
| 0.g951  | 0.125324       | 0.00351728   | 0.258543     | 0.0405134   |
| GE21054 | 0.776906       | 1.85926      | 0.526995     | 1.64772     |
| 1.g5    | 2.82885        | 0.484007     | 3.67932      | 3.00005     |
| GE16826 | 8.67266        | 38.7514      | 8.17896      | 8.1714      |
| GE13040 | 0.0291575      | 0.0112303    | 0.13833      | 0.716646    |
| GE13038 | 1.44773        | 0.0          | 5.34928      | 0.369484    |
| GE21286 | 7.33772        | 35.3616      | 5.99842      | 25.6466     |
| GE12967 | 1.9533         | 5.76889      | 1.81867      | 1.42007     |
| 1.g1354 | 0.0419969      | 0.0          | 0.111257     | 0.092872    |
| GE16584 | 2.03507        | 16.8762      | 2.12453      | 5.10268     |
| GE26259 | 40.6827        | 0.128916     | 15.1555      | 10.2535     |
| GE12967 | 1.9533         | 5.76889      | 1.81867      | 1.42007     |
| GE16953 | 0.120014       | 0.537476     | 0.120596     | 0.0690305   |
| 2.g361  | 0.00773397     | 0.0          | 0.0          | 0.0192081   |
| GE26071 | 8.55841        | 0.68632      | 4.21104      | 2.41655     |
| GE16978 | 3.92049        | 17.4673      | 3.13624      | 4.64776     |
| GE13160 | 0.561831       | 0.215925     | 0.972459     | 11.6932     |
| GE15086 | 2.49297        | 0.0892037    | 7.21166      | 1.44863     |
| 2.g1732 | 0.474107       | 0.0          | 1.4353       | 0.164268    |
| GE17162 | 3.17218        | 16.647       | 3.65224      | 1.82999     |
| GE10771 | 0.0902181      | 0.011496     | 0.110188     | 0.0291091   |
| 3.g15   | 0.0            | 0.510221     | 0.0          | 0.0         |
| GE12967 | 1.9533         | 5.76889      | 1.81867      | 1.42007     |
