# Supplementary material for: Tandem duplications lead to novel expression patterns through exon shuffling in Drosophila yakuba
Source: PubMed Central journal article supplement (PMC5460883; doi:10.1371/journal.pgen.1006795), 2017-05-22
Supplement: pgen.1006795.s012.pdf [file pgen.1006795.s012.pdf]

S11 Table: Ancestral Expression Patterns

| Tissue         | Dup Mean FPKM | All Mean FPKM | Dup Median FPKM | All Median FPKM | Wilcox $W$ | $P$ -value              |
|----------------|---------------|---------------|-----------------|-----------------|------------|-------------------------|
| Ovary          | 23.12815      | 16.65176      | 0.5913          | 0.3053          | 8254952    | $3.291 \times 10^{-4}$  |
| Female Carcass | 19.0621       | 16.8729       | 2.6573          | 1.3851          | 8884288    | $2.282 \times 10^{-16}$ |
| Testes         | 17.78303      | 15.1603       | 3.3762          | 1.9954          | 8743698    | $7.368 \times 10^{-13}$ |
| Male Carcass   | 20.34798      | 17.2835       | 9040304         | 3.3519          | 1.9687     | $2.2 \times 10^{-16}$   |
