# Supplementary material for: Tandem duplications lead to novel expression patterns through exon shuffling in Drosophila yakuba
Source: PubMed Central journal article supplement (PMC5460883; doi:10.1371/journal.pgen.1006795), 2017-05-22
Supplement: pgen.1006795.s013.pdf [file pgen.1006795.s013.pdf]

S12 Table: Ancestral Expression Patterns for Variants in  $\leq \frac{2}{20}$  Strains

| Tissue         | Dup Mean FPKM | All Mean FPKM | Wilcox $W$ | $P$ -value              |
|----------------|---------------|---------------|------------|-------------------------|
| Ovary          | 24.170        | 16.650        | 7207434    | $4.148 \times 10^{-5}$  |
| Female Carcass | 18.910        | 16.879        | 7686539    | $2.694 \times 10^{-15}$ |
| Testes         | 17.300        | 15.160        | 7588718    | $1.045 \times 10^{-12}$ |
| Male Carcass   | 20.912        | 17.284        | 7844719    | $2.2 \times 10^{-16}$   |
