# Supplementary material for: Tandem duplications lead to novel expression patterns through exon shuffling in Drosophila yakuba
Source: PubMed Central journal article supplement (PMC5460883; doi:10.1371/journal.pgen.1006795), 2017-05-22
Supplement: pgen.1006795.s014.pdf [file pgen.1006795.s014.pdf]

S13 Table: Sample strains surveyed

| Stock Number  | Strain    |
|---------------|-----------|
| 14021-0261.01 | Reference |
| 14021-0261.39 | CY04B     |
| 14021-0261.40 | CY08A     |
| 14021-0261.41 | CY17C     |
| 14021-0261.42 | CY20A     |
| 14021-0261.43 | CY21B3    |
| 14021-0261.44 | CY22B     |
| 14021-0261.47 | NY48      |
| 14021-0261.48 | NY56      |
| 14021-0261.49 | NY62      |
| 14021-0261.50 | NY65      |
| 14021-0261.51 | NY66-2    |
| 14021-0261.52 | NY73      |
| 14021-0261.53 | NY81      |
| 14021-0261.54 | NY85      |
| N/A           | CY28A     |
