# Supplementary material for: Tandem duplications lead to novel expression patterns through exon shuffling in Drosophila yakuba
Source: PubMed Central journal article supplement (PMC5460883; doi:10.1371/journal.pgen.1006795), 2017-05-22
Supplement: pgen.1006795.s015.pdf [file pgen.1006795.s015.pdf]

S14 Table: Upregulated genes using Baum-Welch transition probabilities

| Chimeras   | Tissue         | Upregulated | Total |
|------------|----------------|-------------|-------|
|            | Female Carcass | 5           | 76    |
|            | Female Ovary   | 10          | 76    |
|            | Male Carcass   | 10          | 76    |
|            | Male Testes    | 9           | 76    |
|            | All            | 22          | 76    |
| Whole Gene | Tissue         | Upregulated | Total |
|            | Female Carcass | 3           | 66    |
|            | Female Ovary   | 2           | 66    |
|            | Male Carcass   | 1           | 66    |
|            | Male Testes    | 1           | 66    |
|            | All            | 5           | 66    |
