# Supplementary material for: Tandem duplications lead to novel expression patterns through exon shuffling in Drosophila yakuba
Source: PubMed Central journal article supplement (PMC5460883; doi:10.1371/journal.pgen.1006795), 2017-05-22
Supplement: pgen.1006795.s018.pdf [file pgen.1006795.s018.pdf]

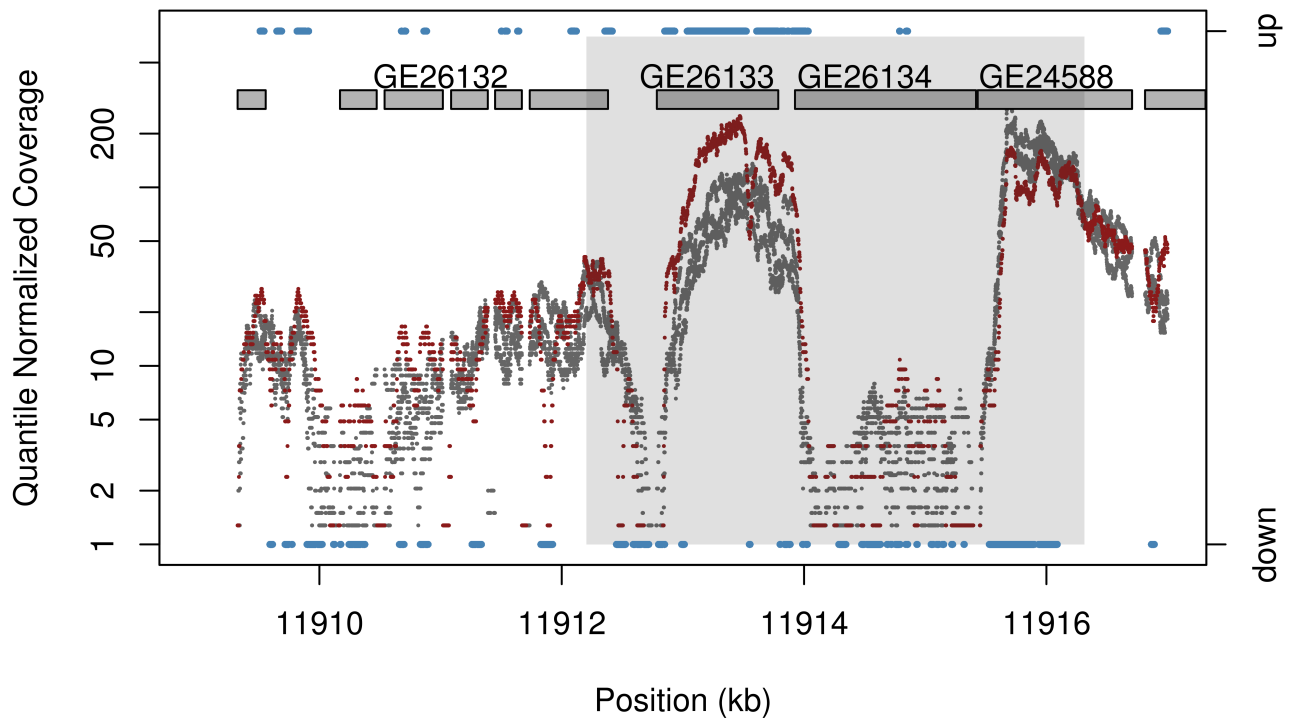

S3 Figure: Expression change in a sample strain containing a whole gene duplication of *GE26133* (reference FPKM=22.0725, sample FPKM=58.6217, uncorrected  $P = 0.00263417$ , corrected  $P = 0.0420917$ ). The tandem duplication also captures the entire gene sequence of *GE26134*, as well as portions of *GE26132* and *GE24588*. The duplicate exhibits greater than two-fold expression of *GE26133* in the sample strain containing the duplication. It is unclear whether the expression change is a direct consequence of duplication, secondary mutation, environmental effects, or other stochastic variation in expression.
