# Supplementary material for: Tandem duplications lead to novel expression patterns through exon shuffling in Drosophila yakuba
Source: PubMed Central journal article supplement (PMC5460883; doi:10.1371/journal.pgen.1006795), 2017-05-22
Supplement: pgen.1006795.s022.pdf [file pgen.1006795.s022.pdf]

### Expression of *Adh* in Female Carcass

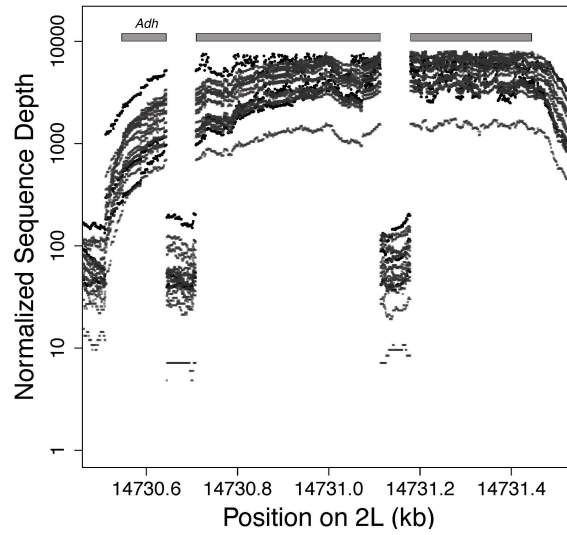

### Expression of *Adh* in Female Ovaries

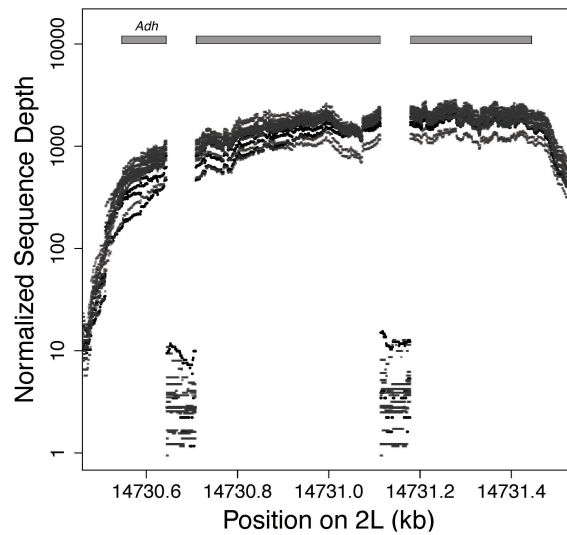

S7 Figure: Normalized coverage in RNA-seq Data for *Adh* in 15 sample strains and 3 replicates of the reference. RNA-seq data shows differentiation between intron and exon sequence and spans the entire length of the transcript.
